# Supplementary material
Source: Springer Nature journal article supplement (https://www.springermedizin.de/resource/supplementary/13229_2013_81_MOESM1_ESM.pdf/9676128)

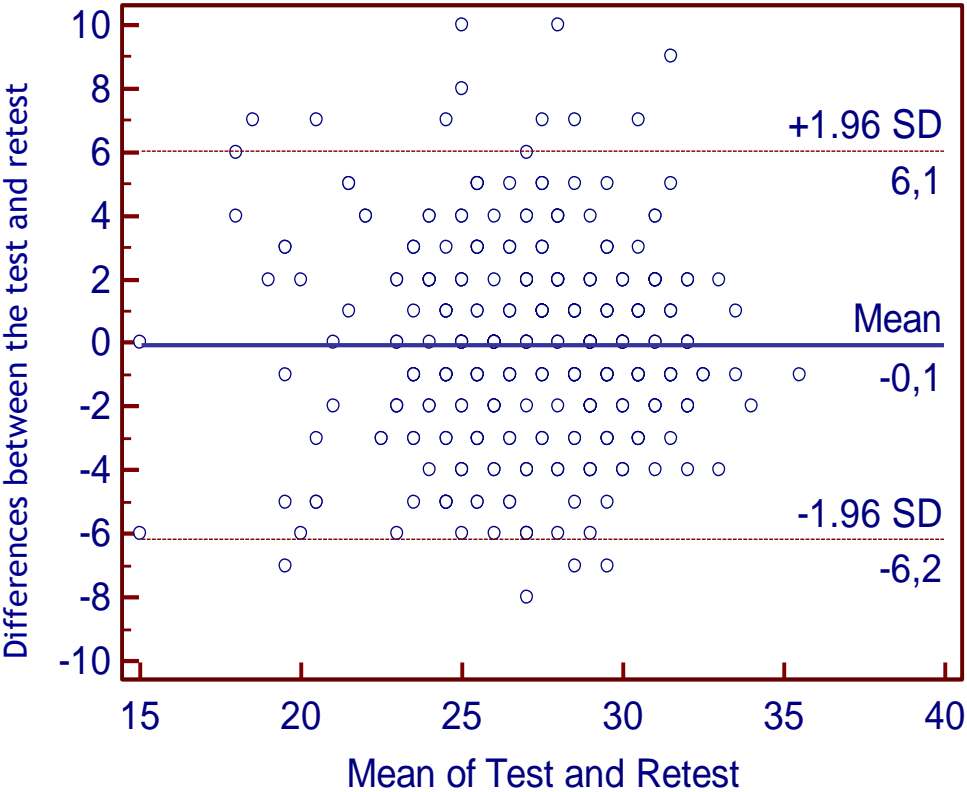

Supplement: MOESM1 [file 9676128]
